# Supplementary material
Source: publisher figshare collection journal article supplement (https://karger.figshare.com/ndownloader/files/25789898)
Supplement: Supplementary file 1 [file 25789898]

**Suppl Fig. 1.** Immunohistochemical analysis of MNSFβ protein expression in mouse placental tissues of a normal pregnant mouse at the day11 of pregnancy (day1 = day of vaginal plug). MNSFβ: Immunostained with anti-MNSFβ antibody; CK8: Immunostained with anti-CK8 (marker of trophoblast cell) antibody.
